# Supplementary material
Source: publisher figshare collection journal article supplement (https://acs.figshare.com/ndownloader/files/4857490)
Supplement: Supplementary file 1 [file 4857490]

## SUPPORTING INFORMATION

### **Superoxide-mediated Extracellular Biosynthesis of Silver Nanoparticles by Fungus *Fusarium oxysporum***

Yongguang Yin,<sup>†,‡</sup> Xiaoya Yang,<sup>†,§</sup> Ligang Hu,<sup>†</sup> Zhiqiang Tan,<sup>†</sup> Lixia Zhao,<sup>†</sup> Zhen  
Zhang,<sup>§</sup> Jingfu Liu,<sup>\*,†</sup> and Guibin Jiang<sup>†</sup>

<sup>†</sup>State Key Laboratory of Environmental Chemistry and Ecotoxicology, Research  
Center for Eco-Environmental Sciences, Chinese Academy of Sciences, Beijing  
100085, China

<sup>‡</sup>Institute of Environment and Health, Jiangnan University, Wuhan 430056, China

<sup>§</sup>School of the Environment, Jiangsu University, Zhenjiang 212013, China

\* Corresponding author.

Tel.: +86-10-62849192; Fax: +86-10-62849192;

E-mail: [jfliu@rcees.ac.cn](mailto:jfliu@rcees.ac.cn)

#### **Contents:**

Figure S1-S4

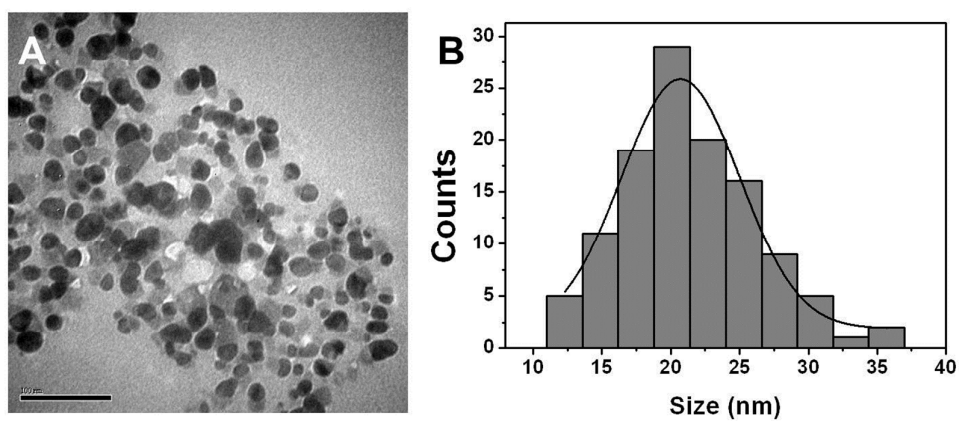

Figure S1. TEM images (A) and size distribution (B) of AgNPs formed by *F. oxysporum*.

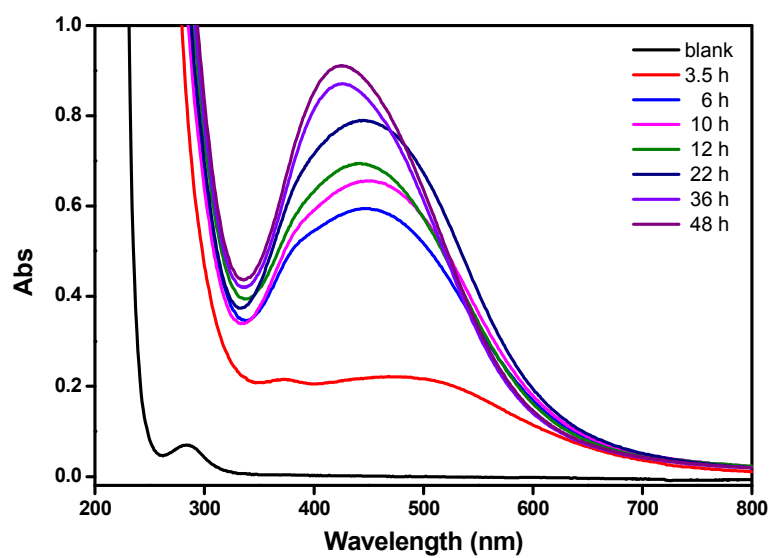

Figure S2. The evolution of UV-vis spectrum of AgNPs formed by *F. oxysporum* with different incubation times.

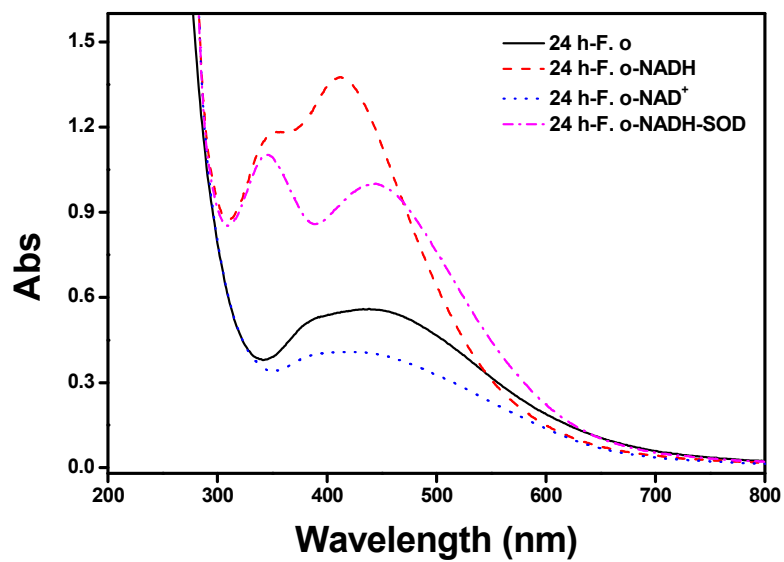

Figure S3. UV-vis absorption spectrum of AgNPs formed by *F. oxysporum* in the presence of NADH or NAD<sup>+</sup> after 24 h incubation.

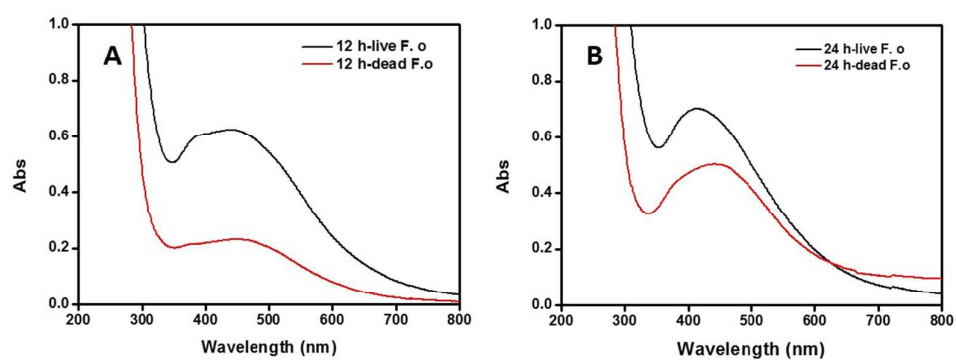

Figure S4. UV-vis absorption spectrum of AgNPs formed by live *F. oxysporum* and heat-sterilized *F. oxysporum* after (A) 12 h and (B) 24 h incubation.
